# Supplementary material
Source: publisher figshare collection journal article supplement (https://gsapubs.figshare.com/ndownloader/files/22747121)
Supplement: Supplementary file 1 [file 22747121]

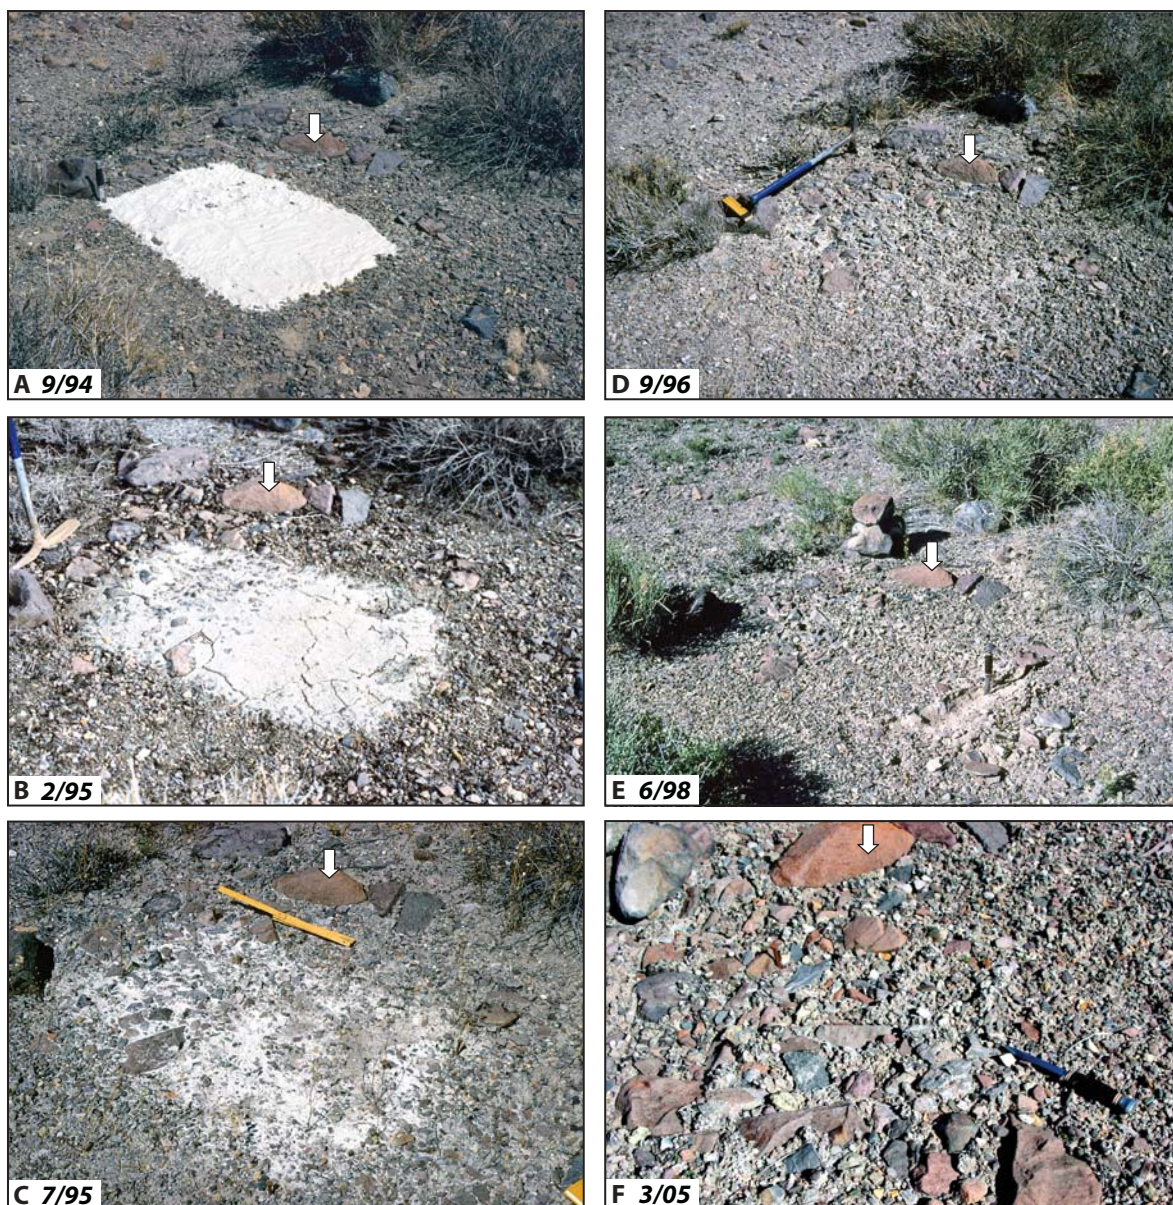

**Fig. DR-1.** Photographic time series over 10 years showing sequential weathering of the 1-2 cm-thick tephra test plot located on a relict terrace surface in Bettles Well Canyon, Gabbs Valley Range. Tephra sample was taken from a nearby outcrop of similar ash (tephra BS-3 in Bell et al., 1999). At time of initial creation in September 1994 (A); arrows point to same rock for reference. After the first six months (B), the ash layer remained cohesive and had developed a case-hardened crust. After 10 months (C), the ash had thinned to < 1 cm and most surface clasts were exhumed from the ash cover. After two years (D), the tephra was no longer preserved as a coherent surface layer, marking the maximum life expectancy of the tephra bed. By 1998 (E) all of the ash had been eroded or intercalated into the A horizon of the soil. In 2005 (F), our inspection showed that the relict terrace surface had been completely reclaimed and that a cryptobiotic crust had formed.

Table DR-1. Radiocarbon data for late Holocene Mono-Inyo Craters tephra.

| Sample No.                                       | <sup>14</sup> C age (yrs BP) | Calibrated Age (Dominant; Cal yrs BP) | Material         | Lab No.     | Comments/References                                                                                                       |
|--------------------------------------------------|------------------------------|---------------------------------------|------------------|-------------|---------------------------------------------------------------------------------------------------------------------------|
| <b>Mina (Gabbs Valley Range-Pilot Mountains)</b> |                              |                                       |                  |             |                                                                                                                           |
| RC-BW4                                           | 435±110                      | 317-543                               | peaty soil       | GX-17253    | 5 cm below 2 cm thick tephra BS27 in peat deposit (Bell <i>et al.</i> , 1999).                                            |
| RC-BW2                                           | 535±150                      | 439-671                               | woody peat       | GX-17251    | 6 cm above 4 cm thick tephra BS25 in peat deposit (Bell <i>et al.</i> , 1999).                                            |
| JY-90-41                                         | 555±40                       | 529-629                               | woody peat       | GS-2962     | Immediately below 20 cm thick tephra-rich silt on south flank of Excelsior Mountains (J.C. Yount, 2005, written commun.). |
| RC-BW5                                           | 790±105                      | 655-899                               | peaty soil       | GX-17254    | 6 cm above 5 cm thick tephra BS25 in peat deposit (Bell <i>et al.</i> , 1999).                                            |
| RC-BW1                                           | 995±110                      | 783-989                               | woody peat       | GX-17250    | 6 cm below 4 cm thick tephra BS25 in peat deposit (Bell <i>et al.</i> , 1999).                                            |
| RC-BW6                                           | 1025±65                      | 829-989                               | peat             | GX-17255    | 6 cm below 5 cm thick tephra BS25 in peat deposit (Bell <i>et al.</i> , 1999).                                            |
| RC-BW7                                           | 1110±110                     | 929-1148                              | woody peat       | GX-17256    | 6 cm above 2 cm thick tephra BS24 in peat deposit (Bell <i>et al.</i> , 1999).                                            |
| JY-90-37                                         | 1175±40                      | 1056-1171                             | woody peat       | GS-2959     | Immediately below 5 cm thick tephra on south flank of Excelsior Mountains (J.C. Yount, 2005, written commun.).            |
| RC-BW10                                          | 1505±110                     | 1308-1517                             | organic soil     | GX-18939    | Av horizon immediately below 1 cm thick tephra BS1in debris flow deposit (Bell <i>et al.</i> , 1999).                     |
| RC-BW8                                           | 1550±110                     | 1335-1545                             | peaty soil       | GX-17257    | 15 cm below 2 cm thick tephra BS24 in peat deposit (Bell <i>et al.</i> , 1999).                                           |
| RC-BW9                                           | 1605±120                     | 1371-1617                             | charcoal         | GX-17566    | Same horizon as 2 cm thick tephra BS2 in debris flow deposit (Bell <i>et al.</i> , 1999).                                 |
| RC-BW11                                          | 2355±405                     | 1894-2853                             | organic soil     | GX-18940    | Av soil horizon immediately below 2 cm thick tephra BS2 in debris flow deposit (Bell <i>et al.</i> , 1999).               |
| JY-90-33                                         | 3849±40                      | 4154-4296                             | woody peat       | GS-2962     | Immediately below six tephra layers on south flank of Excelsior Mountains (J.C. Yount, 2005, written commun.).            |
| <b>Wassuk Range-Bodie</b>                        |                              |                                       |                  |             |                                                                                                                           |
| WA-1                                             | 650±70                       | 557-669                               | charcoal/peat    | Beta-84854  | Immediately below three 2–6 cm thick tephra layers in debris flow deposit in Garfield Creek.                              |
| WA-11                                            | 720±40                       | 660-680                               | charcoal         | Beta-215707 | Fire burn layer immediately below 10 cm thick tephra and ash-filled debris flow in Copper Canyon.                         |
| WA-2                                             | 810±40                       | 680-750                               | charcoal         | Beta-207837 | Immediately below 3–5 cm thick tephra in debris flow deposit in Corey Creek.                                              |
| WA-9                                             | 900±40                       | 760-910                               | charcoal         | Beta-215706 | Fire burn layer immediately below 2–3 cm thick tephra and ash-filled debris flow in Copper Canyon.                        |
| 73RCB187                                         | 1040±40                      | 924-979                               | charcoal         | W-3078      | 15 cm below 5–10 cm thick tephra in probable debris flow deposit in Alum Creek (R.C. Bucknam, 1997, written commun.).     |
| WL-A-1B                                          | 1520±200                     | 1263-1633                             | carbon-rich soil | W-3510      | Immediately below 2 cm thick tephra in probable debris flow deposit in Bodie Creek (R.C. Bucknam, 1997, written commun.). |
| <b>Walker River area</b>                         |                              |                                       |                  |             |                                                                                                                           |
| WR7                                              | 440±130                      | 315-551                               | charcoal         | GX-18130    | 90 cm above 3 cm thick tephra WR7 in river terrace deposit south of Schurz.                                               |
| WR4                                              | 685±135                      | 539-733                               | charcoal         | GX-18127    | Immediately below 4 cm thick tephra WR6 in river terrace deposit south of Schurz.                                         |
| WR6                                              | 1230±125                     | 1055-1282                             | peat             | GX-18129    | 60 cm below 3 cm thick tephra WR7 in river terrace south of Schurz.                                                       |
| WR1                                              | 1455±140                     | 1262-1529                             | charcoal/wood    | GX-16952    | 15 cm above lower 1 cm thick Turupah Flat tephra of Davis (1978) in alluvial deposits at Weber Dam.                       |
| WR2                                              | 1590±130                     | 1347-1614                             | charcoal/wood    | GX-16953    | 3 cm below lower 1 cm thick Turupah Flat tephra of Davis (1978) in alluvial deposits at Weber Dam.                        |
| JOD13                                            | 2000±50                      | 1890-1997                             | charcoal         | TX-2399     | 50 cm below lower 1 cm thick Turupah Flat tephra in alluvial deposits at Weber Dam (Davis, 1978).                         |
| <b>Fairview Peak-Bell Flat</b>                   |                              |                                       |                  |             |                                                                                                                           |
| FP1                                              | 515±235                      | 289-698                               | carbonized wood  | GX-23995    | Immediately below 2 cm thick tephra FP2 in debris flow deposit in Bell Canyon South (Bell <i>et al.</i> , 2004).          |
| FP2                                              | 1335±115                     | 1134-1352                             | charcoal         | GX-23996    | 10 cm below 3 cm thick tephra FP3 in debris flow deposit in Cabin Wash (Bell <i>et al.</i> , 2004).                       |
| <b>Carson Lake</b>                               |                              |                                       |                  |             |                                                                                                                           |
| Adams1                                           | 812±72                       | 674-790                               | charcoal         | AA-42196    | 5 cm below Turupah Flat tephra in beach barrier dune deposit at Salt Wells (Adams, 2003).                                 |
| Adams2                                           | 1510±40                      | 1341-1417                             | grass mat        | GX-29220    | 30 cm below Turupah Flat tephra in lacustrine deposits in trench 5 of Bell (1979); dated by Adams (2003).                 |
| CL1                                              | 1555±140                     | 1307-1569                             | charcoal         | TX-4079     | Equivalent to/slightly above 2 cm thick Turupah Flat tephra (Bell, 1979).                                                 |
| CL3                                              | 1680±110                     | 1508-1711                             | charcoal         | TX-4080     | 60 cm below 2 cm thick Turupah Flat tephra (Bell, 1979).                                                                  |
| <b>Dixie Valley</b>                              |                              |                                       |                  |             |                                                                                                                           |
| SGRC7B                                           | 1040±40                      | 924-979                               | charcoal         | GX-27160    | Immediately below 1 cm thick tephra in Dixie Comstock trench (Caskey <i>et al.</i> , 2002).                               |
| 11Mile                                           | 2585±165                     | 2457-2848                             | organic soil     | GX-17567    | Av soil horizon immediately below 1.5 cm thick tephra in 11Mile Canyon (Bell <i>et al.</i> , 2004).                       |

Adams, K.D., 2003, Age and paleoclimatic significance of late Holocene lakes in the Carson Sink, NV, USA: *Quaternary Research*, v. 60, p. 294–306.

Bell, J.W., 1979, Final Technical Report, Quaternary fault map of the Reno 1 x 2" quadrangle: *US Geological Survey Open-File Report 81-982*, 62 p.

Bell, J.W., dePolo, C.M., Ramelli, A.R., Sama-Wojcicki, A.M., and Meyer, C.E., 1999, Surface faulting and paleoseismic history of the 1932 Cedar Mountain earthquake area, west-central Nevada, and implications for modern tectonics of the Walker Lane: *Geological Society of America Bulletin*, v. 111, no. 6, p. 791–807.

Bell, J.W., Caskey, S.J., Ramelli, A.R., and Guerrieri, L., 2004, Pattern and timing of faulting in the central Nevada seismic belt, and paleoseismic evidence for prior belt-like behavior: *Bulletin of the Seismological Society of America*, v. 94, no. 4, p. 1229–1254.

Caskey, S.J., Bell, J.W., Ramelli, A.R., Adams, K.D., and Reheis, M.C., 2002, Historical faulting, chronostratigraphy, and paleoseismicity of the central Nevada seismic belt: Friends of the Pleistocene, Pacific Cell, 2002 Fall Trip Guidebook, 113 p.

Davis, J.O., 1978, Quaternary tephrochronology of the Lake Lahontan area, Nevada and California: *Nevada Archeological Survey Research Paper 7*, 137 p.
